# Supplementary material
Source: publisher figshare collection journal article supplement (https://future-science-group.figshare.com/articles/dataset/_/17024018)

Spleen

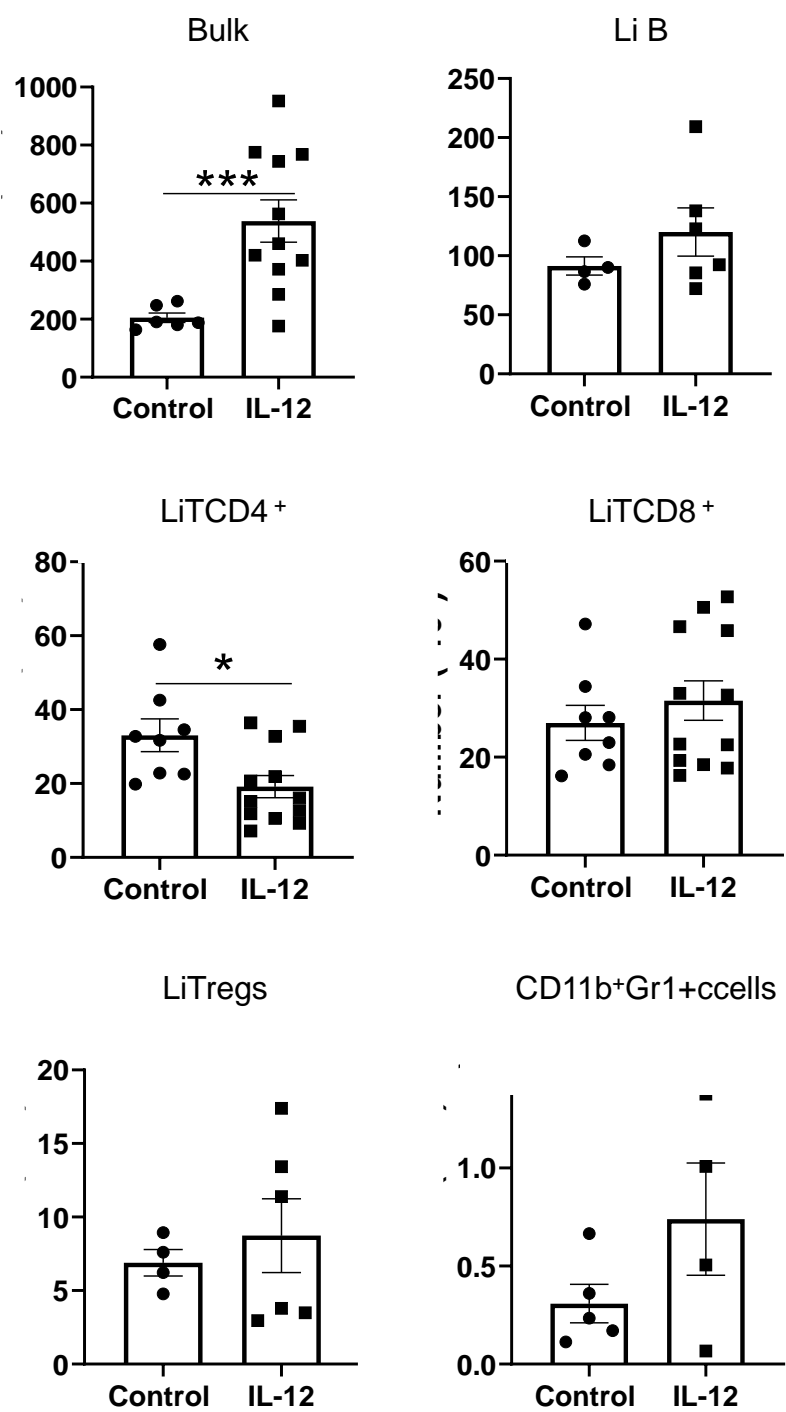

Supplement: Supplementary file 1 [file 1]

Spleen

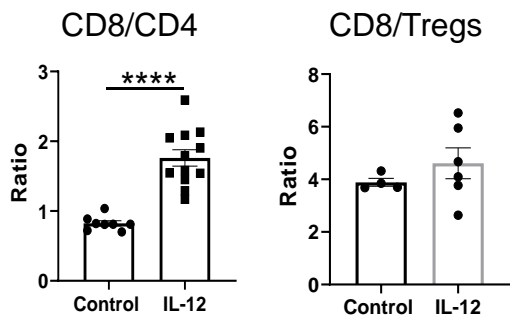

ndLN

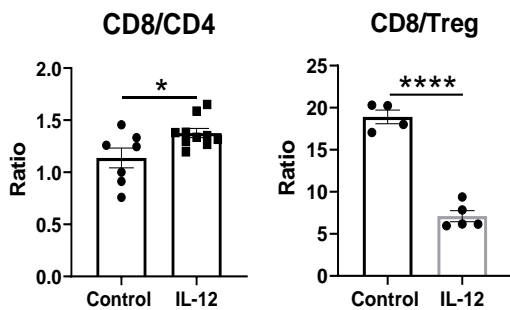

dLN

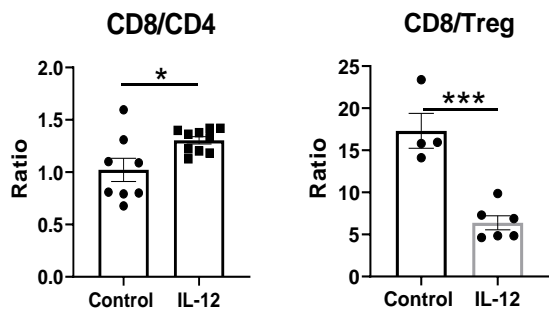

Supplement: Supplementary file 2 [file 1]

Suppl. Figure 1

Effector:Target (1:1)

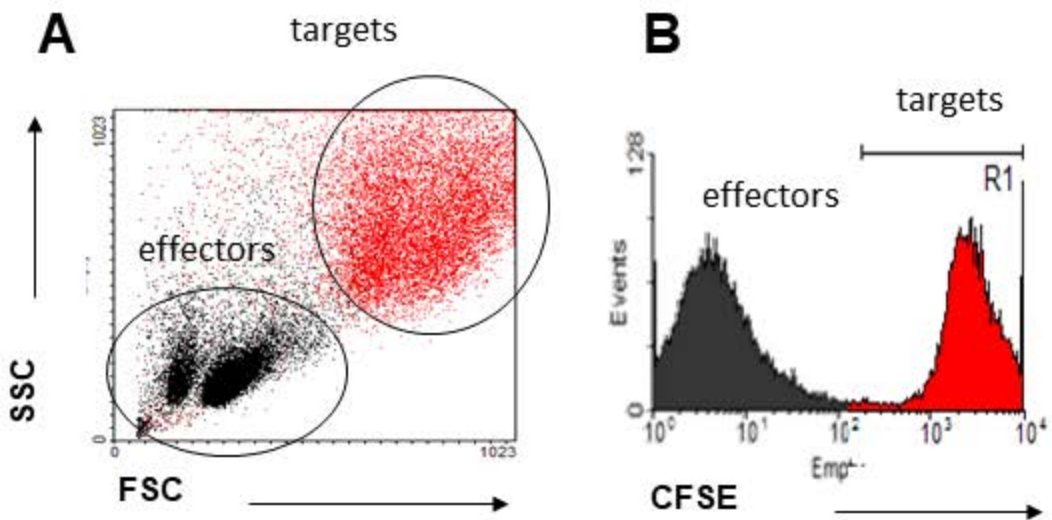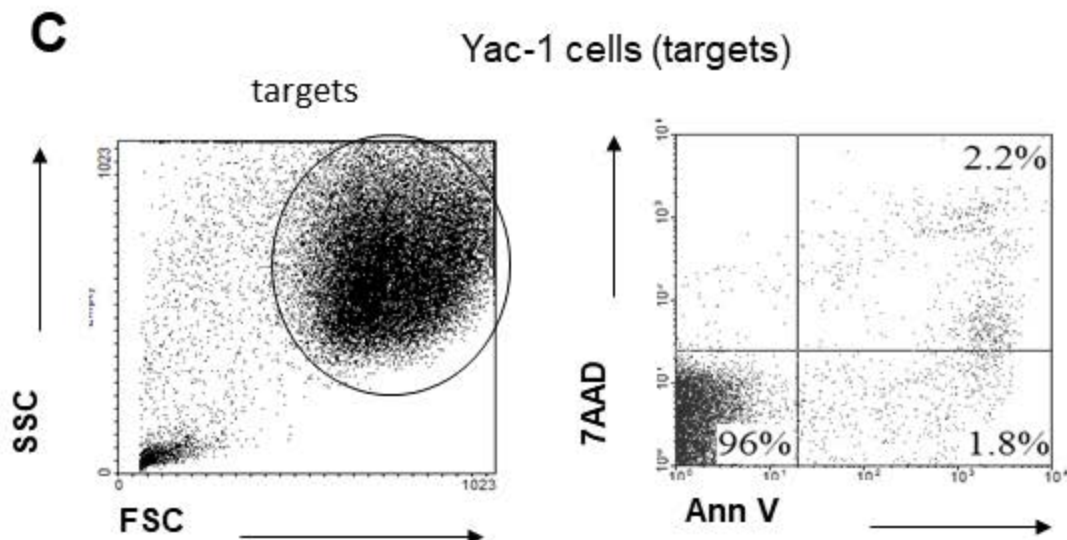

Supplement: Supplementary file 3 [file 1]

Suppl. Figure 2

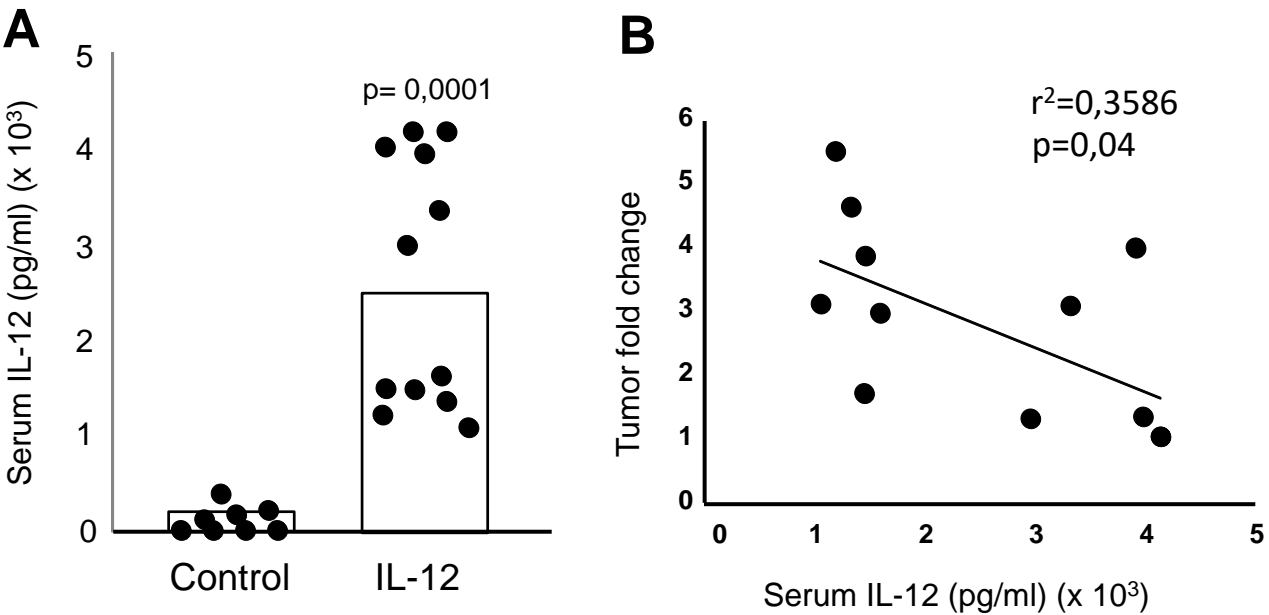

Supplement: Supplementary file 4 [file 1]

Suppl. Figure 5

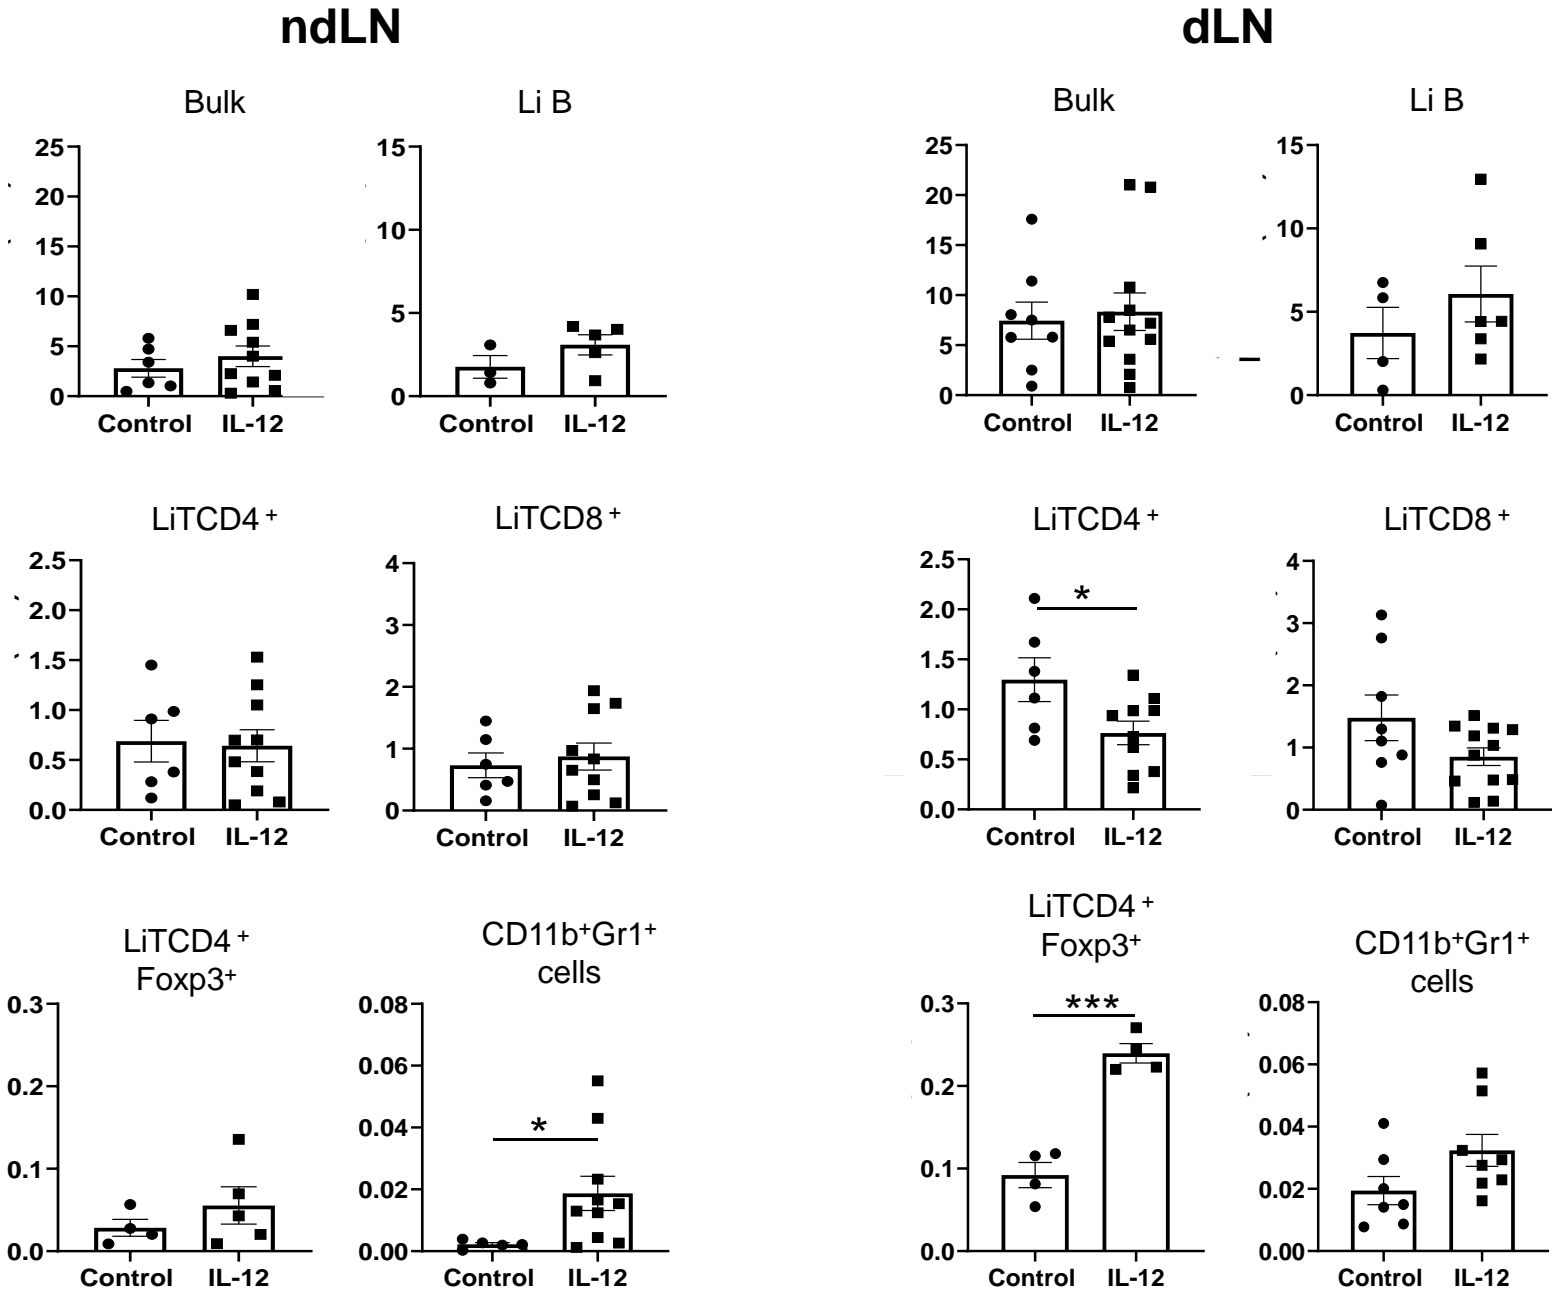

Supplement: Supplementary file 5 [file 1]

# Suppl. Figure 3

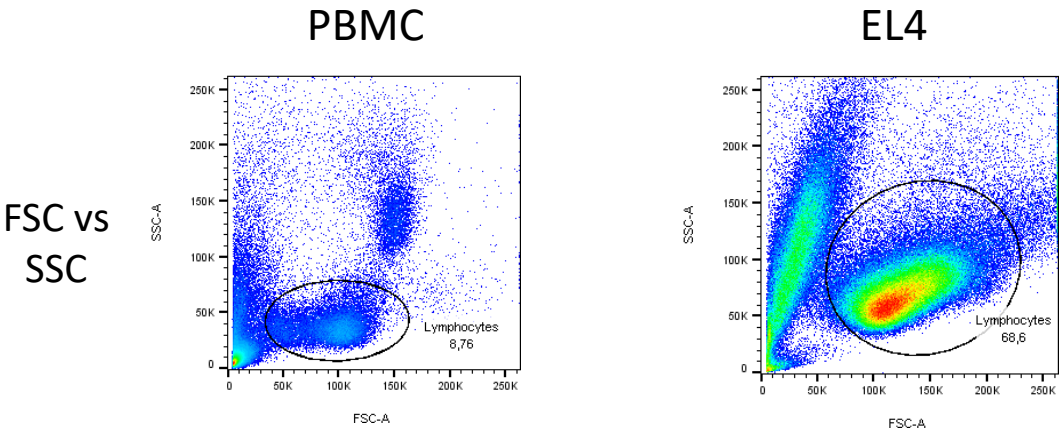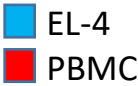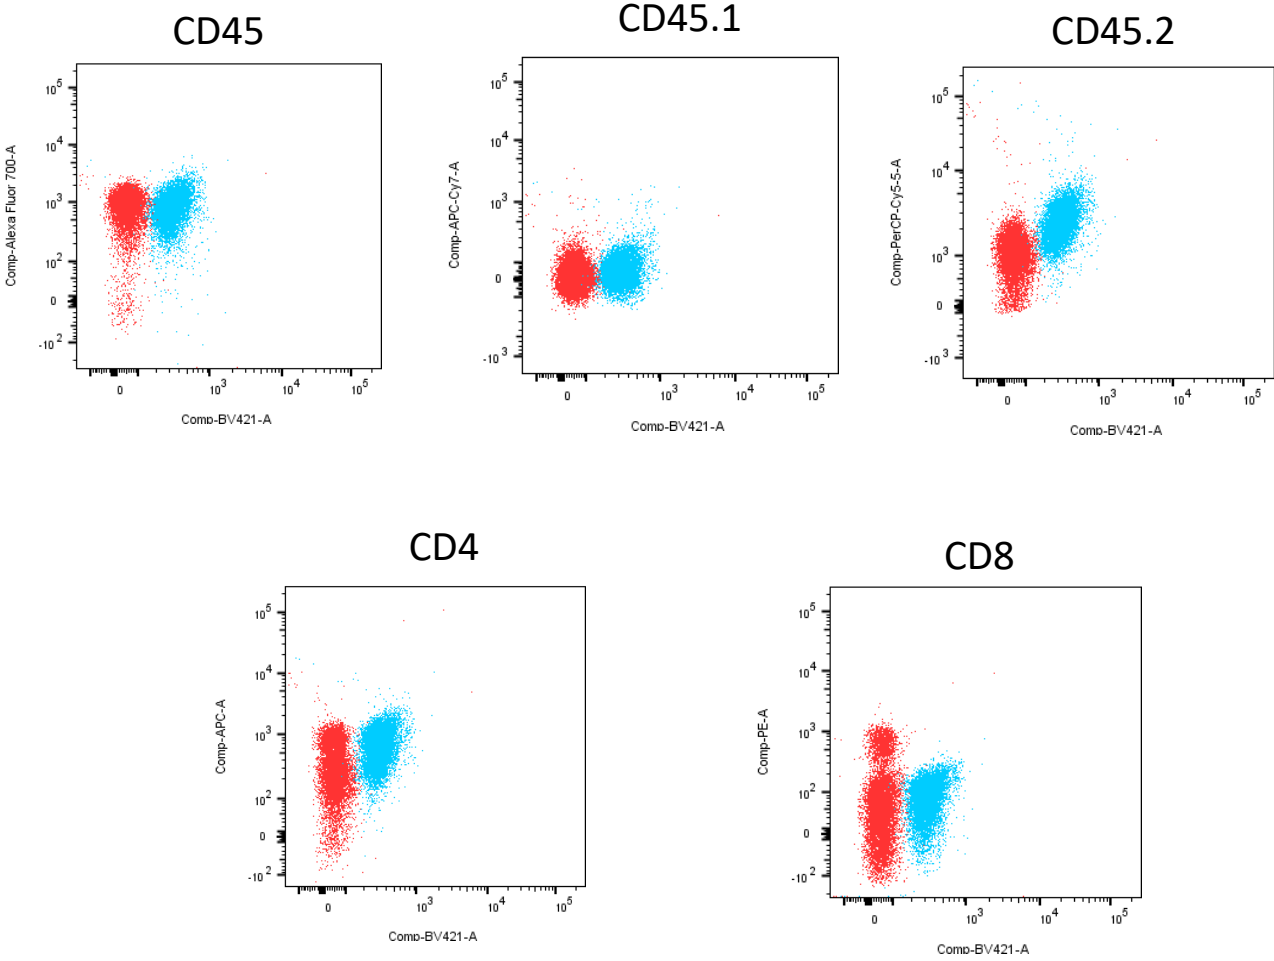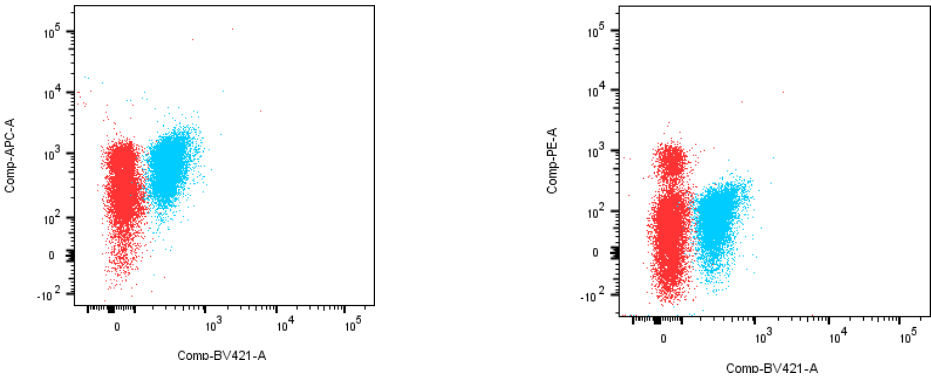

Supplement: Supplementary file 6 [file 1]
